# Supplementary material for: Second derivative synchronous fluorescence determination of avanafil in the presence of its acid-induced degradation product aided by powerful Lean Six Sigma tools augmented with D-optimal design
Source: Royal Society of Chemistry journal article supplement (doi:10.1039/d0ra08216c), 2021-01-01
Supplement: d0ra08216c1.pdf [file d0ra08216c1.pdf]

**Fig. 1S: Half normal plot of all factors estimated effect.**



(A)



(B)



(C)



(D)

Fig. 2S: Normal probability plot of the residuals (A), Box-cox plot (B), residuals versus predicted (C), residuals versus run (D).



Fig. 3S: Contour desirability plot.



Fig. 4S: 3D desirability plot.



**Fig. 5S: overlay desirability plot.**



**Fig. 6S: Numerical optimization ramps view for solutions.**

## Process Capability Report for percent recovery



**Fig.7S: Process capability and performance for the recovery percent of the proposed method.**

**Table 1S: Build information of variables specification and experimental domain**

| Factor | Name            | Type      | Minimum  | Maximum | Coded Low (-1) | Coded high (+1) |
|--------|-----------------|-----------|----------|---------|----------------|-----------------|
| A      | pH buffer       | Numeric   | 2.00     | 6.00    | 2.00           | 6.00            |
| B      | $\Delta\lambda$ | Numeric   | 60.00    | 160.00  | 60.00          | 160.00          |
| C      | solvent type    | Categoric | Methanol | Ethanol | Methanol       | Ethanol         |
| D      | width scan      | Numeric   | 5.00     | 10.00   | 5.00           | 10.00           |
| E      | surfactant type | Categoric | SDS      | CTAB    | SDS            | CTAB            |

**factors in fractional factorial design****Table 2S: fractional factorial design for experimental variables and synchronous fluorescence intensity response**

| Run | Factor 1    | Factor 2           | Factor 3       | Factor 4     | Factor 5          | Response 1                         |
|-----|-------------|--------------------|----------------|--------------|-------------------|------------------------------------|
|     | A:pH buffer | B: $\Delta\lambda$ | C:solvent type | D:width scan | E:surfactant type | synchronous Fluorescence intensity |
| 1   | 2           | 60                 | Ethanol        | 5            | SDS               | 710                                |
| 2   | 2           | 160                | Ethanol        | 10           | SDS               | 650                                |
| 3   | 2           | 160                | Ethanol        | 5            | CTAB              | 678                                |
| 4   | 6           | 160                | Ethanol        | 10           | CTAB              | 620                                |
| 5   | 6           | 160                | Methanol       | 5            | CTAB              | 730                                |
| 6   | 2           | 60                 | Methanol       | 10           | SDS               | 870                                |
| 7   | 6           | 60                 | Methanol       | 10           | CTAB              | 760                                |
| 8   | 6           | 160                | Ethanol        | 5            | SDS               | 618                                |
| 9   | 2           | 160                | Methanol       | 5            | SDS               | 760                                |
| 10  | 2           | 60                 | Ethanol        | 10           | CTAB              | 710                                |
| 11  | 2           | 160                | Methanol       | 10           | CTAB              | 850                                |
| 12  | 2           | 60                 | Methanol       | 5            | CTAB              | 866                                |
| 13  | 6           | 60                 | Ethanol        | 10           | SDS               | 670                                |
| 14  | 6           | 60                 | Methanol       | 5            | SDS               | 820                                |
| 15  | 6           | 160                | Methanol       | 10           | SDS               | 670                                |
| 16  | 6           | 60                 | Ethanol        | 5            | CTAB              | 690                                |

**Table 3S ANOVA for selected fractional factorial model**

| Source             | Sum of Squares | df | Mean Square | F-value | p-value  |             |
|--------------------|----------------|----|-------------|---------|----------|-------------|
| <b>Model</b>       | 93566.00       | 3  | 31188.67    | 30.74   | < 0.0001 | significant |
| A-pH buffer        | 16641.00       | 1  | 16641.00    | 16.40   | 0.0016   |             |
| B- $\Delta\lambda$ | 16900.00       | 1  | 16900.00    | 16.66   | 0.0015   |             |
| C-solvent type     | 60025.00       | 1  | 60025.00    | 59.17   | < 0.0001 |             |
| <b>Residual</b>    | 12174.00       | 12 | 1014.50     |         |          |             |
| <b>Cor Total</b>   | 1.057E+05      | 15 |             |         |          |             |

The **Model F-value** of 30.74 implies the model is significant. There is only a 0.01% chance that an F-value this large could occur due to noise.

**P-values** less than 0.0500 indicate model terms are significant. In this case A, B, C are significant model terms.

**Table 4S: Build information of variables specification and experimental domain factors in D-optimal design**

| Factor | Name            | Minimum  | Maximum | Coded Low (-1) | Coded high (+1) | Mean Centre point (0) |
|--------|-----------------|----------|---------|----------------|-----------------|-----------------------|
| A      | pH buffer       | 2.00     | 7.00    | 2.00           | 7.00            | 4.50                  |
| B      | $\Delta\lambda$ | 60.00    | 160.00  | 60.00          | 160.00          | 110                   |
| C      | solvent type    | methanol | ethanol | methanol       | ethanol         | methanol              |

**Table 5S: D-optimal design for experimental variables and synchronous fluorescence intensity response**

| Run | Factor 1<br>A:pH buffer | Factor 2<br>B: $\Delta\lambda$ | Factor 3<br>C:solvent type | Response 1<br>Fluorescence intensity |
|-----|-------------------------|--------------------------------|----------------------------|--------------------------------------|
| 1   | 7                       | 160                            | ethanol                    | 599                                  |
| 2   | 7                       | 93.3333                        | methanol                   | 715                                  |
| 3   | 4.5                     | 110                            | ethanol                    | 830                                  |
| 4   | 4.5                     | 160                            | methanol                   | 750                                  |
| 5   | 4.5                     | 60                             | ethanol                    | 730                                  |
| 6   | 4.5                     | 110                            | ethanol                    | 830                                  |
| 7   | 2                       | 60                             | ethanol                    | 630                                  |
| 8   | 7                       | 110                            | ethanol                    | 710                                  |
| 9   | 2                       | 110                            | ethanol                    | 712                                  |
| 10  | 5.33333                 | 160                            | methanol                   | 710                                  |
| 11  | 2                       | 160                            | ethanol                    | 600                                  |
| 12  | 4.5                     | 110                            | methanol                   | 855                                  |
| 13  | 7                       | 93.3333                        | methanol                   | 715                                  |
| 14  | 5.33333                 | 160                            | methanol                   | 710                                  |
| 15  | 3.66667                 | 60                             | methanol                   | 750                                  |
| 16  | 2                       | 126.667                        | methanol                   | 760                                  |
| 17  | 7                       | 60                             | ethanol                    | 600                                  |

**Table 6S: fitting summary for the suggested experimental design.**

| Source           | Sequential p-value | Lack of Fit p-value | Adjusted R <sup>2</sup> | Predicted R <sup>2</sup> |                  |
|------------------|--------------------|---------------------|-------------------------|--------------------------|------------------|
| Linear           | 0.5215             |                     | -0.0413                 | -0.3911                  |                  |
| 2FI              | 0.9744             |                     | -0.3256                 | -3.2080                  |                  |
| <b>Quadratic</b> | <b>&lt; 0.0001</b> |                     | <b>0.9884</b>           | <b>0.9613</b>            | <b>Suggested</b> |
| Cubic            |                    |                     | 1.0000                  |                          | Aliased          |



**Table 7S ANOVA for Quadratic model**

| Source             | Sum of Squares | df | Mean Square | F-value | p-value     |               |
|--------------------|----------------|----|-------------|---------|-------------|---------------|
| <b>Model</b>       | 97244.34       | 8  | 12155.54    | 171.31  | <<br>0.0001 | significant   |
| A-pH buffer        | 1965.79        | 1  | 1965.79     | 27.70   | 0.0008      |               |
| B- $\Delta\lambda$ | 743.02         | 1  | 743.02      | 10.47   | 0.0120      |               |
| C-solvent type     | 3295.00        | 1  | 3295.00     | 46.44   | 0.0001      |               |
| AC                 | 825.41         | 1  | 825.41      | 11.63   | 0.0092      |               |
| A <sup>2</sup>     | 38597.70       | 1  | 38597.70    | 543.95  | <<br>0.0001 |               |
| B <sup>2</sup>     | 42236.28       | 1  | 42236.28    | 595.23  | <<br>0.0001 |               |
| <b>Residual</b>    | 567.66         | 8  | 70.96       |         | 0.085       | insignificant |
| Lack of Fit        | 567.66         | 5  | 113.53      |         |             |               |
| Pure Error         | 0.0000         | 3  | 0.0000      |         |             |               |
| <b>Cor Total</b>   | 97812.00       | 16 |             |         |             |               |

Factor coding is **Coded**.

Sum of squares is **Type III - Partial**

The **Model F-value** of 171.31 implies the model is significant. There is only a 0.01% chance that an F-value this large could occur due to noise.

**P-values** less than 0.0500 indicate model terms are significant. In this case A, B, C, AC, A<sup>2</sup>, B<sup>2</sup> are significant model terms. Values greater than 0.1000 indicate the model terms are not significant. If there are many insignificant model terms (not counting those required to support hierarchy), model reduction may improve your model.

**Table 8S Fit Statistics**

|                  |        |  |                                |         |
|------------------|--------|--|--------------------------------|---------|
| <b>Std. Dev.</b> | 8.42   |  | <b>R<sup>2</sup></b>           | 0.9942  |
| <b>Mean</b>      | 718.00 |  | <b>Adjusted R<sup>2</sup></b>  | 0.9884  |
| <b>C.V. %</b>    | 1.17   |  | <b>Predicted R<sup>2</sup></b> | 0.9613  |
|                  |        |  | <b>Adeq Precision</b>          | 42.6169 |

The **Predicted R<sup>2</sup>** of 0.9613 is in reasonable agreement with the **Adjusted R<sup>2</sup>** of 0.9884; i.e. the difference is less than 0.2.

**Adeq Precision** measures the signal to noise ratio. A ratio greater than 4 is desirable. Your ratio of 42.617 indicates an adequate signal. This model can be used to navigate the design space.

**Table 9S: Solutions determination of optimum response.**

| Number   | pH buffer    | $\Delta\lambda$ | solvent type    | Fluorescence intensity* | Desirability | Desirability (w/o Intervals) |                 |
|----------|--------------|-----------------|-----------------|-------------------------|--------------|------------------------------|-----------------|
| <b>1</b> | <b>4.226</b> | <b>107.974</b>  | <b>methanol</b> | <b>859.635</b>          | <b>0.985</b> | <b>1.000</b>                 | <b>Selected</b> |
| 2        | 4.433        | 107.751         | ethanol         | 827.799                 | 0.863        | 0.894                        |                 |
